# Supplementary material
Source: Springer Nature journal article supplement (https://www.springermedizin.de/resource/supplementary/13023_2012_406_MOESM3_ESM.pdf/9642222)

IV-2

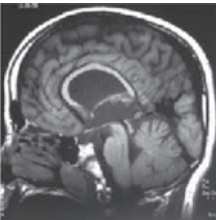

IV-4

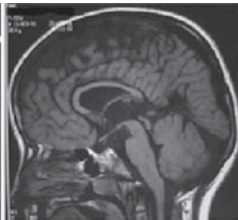

IV-9

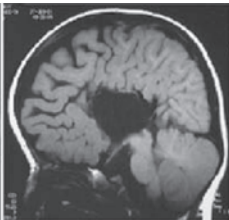

IV-19

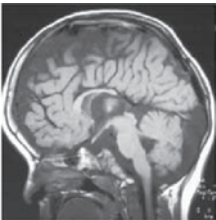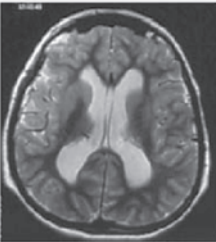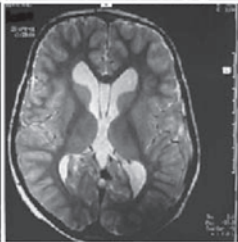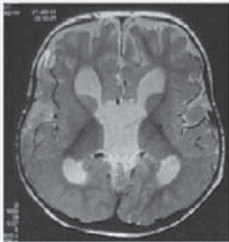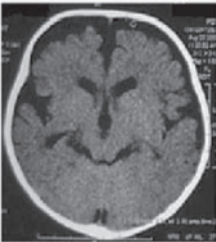

Supplement: MOESM3 [file 9642222]
